1 **Predation by *Bdellovibrio bacteriovorus* transforms the landscape**  
2 **and community assembly of bacterial biofilms**

3

4

5 Benjamin R. Wucher<sup>1</sup>, Mennat Elsayed<sup>2</sup>, Daniel E. Kadouri<sup>2</sup>, Carey D. Nadell<sup>1</sup>

6

7 <sup>1</sup> Department of Biological Sciences, Dartmouth, Hanover, NH, USA

8 <sup>2</sup> Department of Oral Biology, Rutgers School of Dental Medicine, Newark, NJ, USA

9

10 Correspondence to:

11 Carey D. Nadell

12 1976 Life Sciences Center

13 78 College St., Hanover NH 03755

14 Email: [carey.d.nadell@dartmouth.edu](mailto:carey.d.nadell@dartmouth.edu)

15 **The predatory bacterium *Bdellovibrio bacteriovorus* follows a life cycle in which it attaches to the**  
16 **exterior of a Gram-negative prey cell, enters the periplasm, and harvests resources to replicate**  
17 **before lysing the host to find new prey. Predatory bacteria such as this are common in many natural**  
18 **environments, as are groups of matrix-bound clusters of prey cells, termed biofilms. Despite the**  
19 **ubiquity of both predatory bacteria and biofilm-dwelling prey, the interaction between *B.***  
20 ***bacteriovorus* and prey cells inside biofilms has received little attention and has not yet been studied**  
21 **at the micrometer scale. Filling this knowledge is critical to understanding the nature of predator-**  
22 **prey interaction in nature. Here we show that *B. bacteriovorus* is able to prey upon biofilms of the**  
23 **pathogen *Vibrio cholerae*, but only up until a critical maturation threshold past which the prey**  
24 **biofilms are protected from their predators. We determine the contribution of matrix secretion and**  
25 **cell-cell packing of the prey biofilm toward this protection mechanism. Our results demonstrate**  
26 **that *B. bacteriovorus* predation in the context of this protection threshold fundamentally transforms**  
27 **the sub-millimeter scale landscape of biofilm growth, as well as the process of community assembly**  
28 **as new potential biofilm residents enter the system.**

29

30

31 Biofilms are a common mode of microbial life in which cells of one or more species produce surface-  
32 attached or free-floating communities that are bound by a self-produced polymer matrix<sup>1-3</sup>. They are  
33 thought to be fundamental to microbial ecology in contexts including marine snow carbon cycling<sup>4-6</sup>, the  
34 rhizosphere<sup>7</sup>, microbiomes on or within multicellular organisms<sup>8,9</sup>, and acute and chronic infections<sup>10-13</sup>.  
35 Biofilm-dwelling bacteria collectively orchestrate their architecture using many mechanisms including  
36 the matrix; this architecture then influences surface occupation, dispersal, competition for space and  
37 nutrients, and protection from exogenous threats<sup>3,14-16</sup>.

38 Many studies have shed light on the mechanisms that biofilms use in response to bottom-up  
39 selective pressures such as spatial or nutritional competition<sup>15,17-21</sup>. Others have examined the influence  
40 of top-down selective pressures including toxin exposure and predation, which can have a profound impact  
41 on the behavior and survival of biofilm communities<sup>16,22-25</sup>. The effects of antibiotic exposure on biofilms  
42 have been investigated in detail<sup>26-28</sup>. For example: some but not all antimicrobials are blocked from  
43 diffusing completely into biofilms, and those that do permeate biofilms can substantially alter their spatial  
44 organization. Other recent work assessed the interaction of bacteriophages and biofilms at single-cell  
45 resolution, finding that some biofilms can block phage entry using components of the secreted matrix<sup>28-</sup>

46 30. The micrometer-scale dynamics of interaction between biofilms and predators that are orders of  
47 magnitude larger have received far less attention, however. A key example of such a predator is  
48 *Bdellovibrio bacteriovorus*, which is ubiquitous in natural environments<sup>31–35</sup>.

49 *B. bacteriovorus*, a delta-proteobacterium approximately 1  $\mu\text{m}$  in length, most often exhibits an  
50 obligate predatory lifestyle in which it targets Gram-negative prey, bores through the outer membrane into  
51 the periplasm, harvests cytoplasmic resources to replicate, and lyses the host cell in search of new prey<sup>36–</sup>  
52 42. *B. bacteriovorus* has been shown to predate *Escherichia coli* and *Pseudomonas fluorescens* biofilms in  
53 static culture and under flow<sup>43</sup>. Numerous studies have isolated *B. bacteriovorus* directly from biofilms  
54 on abiotic substrata and the surfaces of animals and plants in aquatic environments<sup>44–49</sup>. Furthermore,  
55 predatory bacteria appear capable of navigating spatially complex environments with quite some  
56 sophistication; for example, *B. bacteriovorus* can use fungal hyphae to disperse and prey upon distant  
57 populations in the soils<sup>50,51</sup>. Predatory bacteria and biofilm communities are thus known to be widespread  
58 in nature and commonly to interact <sup>25,32,39,52,53</sup>, but the details of this interaction have never been studied  
59 at single-cell resolution; this is a critical gap in our knowledge of the spatial ecology of *B. bacteriovorus*  
60 predation.

61 In aquatic environments, predatory bacteria are strong modulators of the *Vibrio* clade<sup>53</sup>, and *V.*  
62 *cholerae* is a known susceptible prey target to *B. bacteriovorus* in estuarine environments<sup>33,52</sup>. We  
63 therefore chose *Vibrio cholerae* as a model organism to examine *B. bacteriovorus* interaction with prey  
64 biofilms, because its architectural dynamics and matrix components have been characterized in depth<sup>54–</sup>  
65 56. Using a combination of microfluidic culture, confocal imaging, and detailed spatial analysis, we  
66 explore how biofilm structure and composition can affect the outcome of bacterial predation pressure, as  
67 well as the broader ecological impacts that predation can have on a biofilm community. We find that  
68 exposure to bacterial predators fundamentally alters the landscape of biofilm growth and communal  
69 defense against infiltration by newly arriving planktonic bacteria.

70

## 71 **Results**

### 72 ***V. cholerae* biofilms have a maturation threshold for protection from *B. bacteriovorus***

73 To evaluate the interaction between pre-formed resident *V. cholerae* biofilms and their bacterial predators,  
74 we first cultivated *V. cholerae* on glass surfaces in microfluidic devices (see Materials and Methods).  
75 Approximately 48h after the initial surface inoculation and initiation of flow, we introduced *B.*  
76 *bacteriovorus* into the chambers over a period of 30 min ( $2.5 \times 10^9$  PFU/mL at  $0.2 \mu\text{L}/\text{min}$  flow rate, or

77 approximately  $1.5 \times 10^7$  *B. bacteriovorus* cells in total), followed by resumption of predator-free medium  
78 flow for the remainder of the experiment. Biofilms were then imaged through their entire 3D volume by  
79 confocal microscopy.

80 Successful predation and bdelloplast formation could be seen throughout the microfluidic arena  
81 among singleton prey *V. cholerae*. Cells on the periphery of biofilm clusters appeared susceptible as well,  
82 but the centers of larger biofilm clusters remained devoid of predator cells (Figure 1A). It is possible that  
83 protection of cells in the interior might be temporary, and that over time *B. bacteriovorus* could mobilize  
84 and consume cells throughout the biofilm. However, this was not the case: images taken 48 h after initial  
85 predator exposure showed that cells on the interior of these clusters remained unexposed to predation;  
86 remaining *B. bacteriovorus* cells were immobilized in the matrix milieu around resident prey throughout  
87 the expanding front (Figure 1B). These results suggest that one or more features of *V. cholerae* biofilm  
88 architecture might inhibit predator cells from penetrating the interior of the biofilm after initial attachment.

89 We next sought to understand what components of *V. cholerae* biofilm structure influence spatial  
90 access by predatory cells. Prior work has linked protection of biofilms from entry by bacteriophages and  
91 competing microbes to the production of proteinaceous or polysaccharide constituents of the biofilm  
92 matrix<sup>16,21,28</sup>. Following this precedent, we were curious as to the contribution of the matrix in protection  
93 from *B. bacteriovorus* predation. To pursue this question we introduced a 3x-FLAG epitope to the N-  
94 terminus of the *V. cholerae* matrix protein RbmA; this construct allowed us to directly visualize the matrix  
95 without altering its function<sup>21</sup>. RbmA has been extensively characterized as a key matrix component, along  
96 with vibrio polysaccharide (VPS), in controlling cell-cell packing and alignment architecture within  
97 biofilms of this species<sup>3,14,54,57</sup>. Our visualizations showed that *B. bacteriovorus* localized within the  
98 outermost layers of cells and matrix material in the periphery of larger biofilm clusters. *V. cholerae* cells  
99 outside of the matrix were frequently preyed upon (Figure 2A-B). Visual inspection alone could not  
100 determine whether or not proximity to matrix was sufficient on its own to prevent prey killing by predatory  
101 bacteria, as is the case in protection of *E. coli* against attack by T7 bacteriophages<sup>16,29</sup>.

102 To resolve this uncertainty, sought to measure at spatial high resolution the amount of secreted  
103 matrix, the cell-cell packing density among prey *V. cholerae* cells, and the relationship between these  
104 biofilm architecture features and the extent of local predation by *B. bacteriovorus*. To accomplish this, we  
105 used the BiofilmQ analysis framework to segment predator and prey biovolumes and to dissect them into  
106 a 3-D grid, with each cubic grid unit measuring 2.6  $\mu\text{m}$  on a side. At this resolution, the grid units could  
107 contain 3-5 cells of *V. cholerae* and/or *B. bacteriovorus*. For each grid unit we calculated i) the local matrix

108 accumulation around *V. cholerae*; ii) the local biovolume fraction (i.e. how much of each grid unit was  
109 occupied by *V. cholerae*); iii) the neighborhood biovolume fraction (i.e., how much of a 10  $\mu\text{m}$  diameter  
110 bubble around each unit was occupied by *V. cholerae*); and finally iv) an overlap coefficient between *V.*  
111 *cholerae* and *B. bacteriovorus* (which corresponds to the degree of predation, see Materials and Methods).  
112 Note that the local and neighborhood biovolume fractions are both proxies for cell-cell packing of prey *V.*  
113 *cholerae*, but on two spatial scales, and so they yield different information about localized versus  
114 surrounding cell-packing architecture. For example, a small biofilm cluster of 5-10 cells that have begun  
115 to produce matrix typically has high local volume fraction, because its cells are all in close proximity; but  
116 such a nascent biofilm also has low neighborhood volume fraction, because it has not yet expanded into a  
117 mature biofilm cluster. Visual representations of the segmentation process and the parameters we  
118 calculated can be found in SI Figure S1.

119 Using the metrics described above we analyzed  $n = 23$  independent image stacks (summarized in  
120 Figure 2C), which revealed four different biofilm sub-populations. We label these D-G for correspondence  
121 with examples of each in panels D-G of Figure 1. Population D includes singleton *V. cholerae* cells with  
122 zero matrix, low local and neighborhood biovolume fractions, and which have been preyed upon by *B.*  
123 *bacteriovorus* (Figure 2D). Population E includes singletons much like population E, but which have not  
124 yet been found by a predator cell (Figure 2E). Population F includes *V. cholerae* clusters that have begun  
125 producing matrix, but which had not yet formed hemi-spherical groups; this sub-population had detectable  
126 matrix signal, high local biovolume fraction, but low neighborhood biovolume fraction (Figure 2F). Also  
127 in group F were units on the outer periphery of larger biofilm clusters. These cells, despite accumulating  
128 matrix and high local density, were susceptible to predation (SI Figure S2). Lastly, population G included  
129 groups of cells on the interior of larger biofilm clusters; these had high matrix accumulation, high local  
130 and neighborhood biovolume fractions, and almost complete protection from predation (Figure 2G).  
131 Overall, these results suggest that local matrix accumulation alone is not sufficient for protection from *B.*  
132 *bacteriovorus*; rather, a combination of matrix secretion and cell-cell packing is at play.

133 To further explore the interaction between matrix production, cell-cell packing, and predation  
134 protection, we studied two additional mutants and their susceptibility to *B. bacteriovorus*. One is a  
135 *vpvW240R* point mutant that constitutively produces extracellular matrix – we refer to this strain as a matrix  
136 hyper-secretor. The other,  $\Delta\text{rbmA}$ , harbors a clean deletion of the *rbmA* locus and therefore cannot produce  
137 the core matrix protein RbmA. The hyper-secretor rapidly generates highly compact biofilm clusters  
138 relative to wild type<sup>58–60</sup>, and  $\Delta\text{rbmA}$  produces biofilms with far looser cell-cell packing and altered cell

139 orientation architecture<sup>3,14,19,21,55</sup>. These strains – and WT for comparison – were grown in monoculture  
140 microfluidic devices and subjected to a single dose of *B. bacteriovorus* (Figure 3A-C).

141 The resulting image data were again segmented and dissected into a cubic grid for spatial analysis  
142 as described above. Panels D-F in Figure 3 show heatmaps of local versus neighborhood biovolume  
143 fraction with points color-coded according to predation state; panels G-H in Figure 3 show analogous  
144 heatmaps, but with points color-coded according to local RbmA accumulation. From this analysis it is  
145 evident that both WT and matrix hyper-secreting strains have a critical neighborhood biovolume fraction  
146 (~ 0.8) past which patches of cells are protected from predator exposure (Figure 3D-E; SI Figure S3). Cell  
147 clusters of the matrix hyper-secreting strain reached this threshold more quickly, and so had greater total  
148 protection against predation (SI Figure S4, S5). Importantly, however, even though the matrix hyper-  
149 secreting strain has a higher signature of matrix secretion (Figure 3G-H), its threshold biovolume fraction  
150 for protection against *B. bacteriovorus* was the same as that of WT. By comparison, biofilms of the  $\Delta rbmA$   
151 strain never reach the biovolume fraction threshold required for protection against predator attack, and  
152 nearly all cells are killed (Figure 3F).

153 Altogether these data suggest that it is not the extracellular matrix on its own but rather the collective  
154 cell-cell packing that emerges from cell-matrix and cell-cell interaction that ultimately provide protection  
155 against predation by *B. bacteriovorus*. Another striking implication of our analysis is that there is not one  
156 but two advancing fronts on the outer periphery of growing *V. cholerae* biofilms. The first is the true outer  
157 layer of biofilm expansion in which cells are producing extracellular matrix but have not yet achieved the  
158 cell-packing required for *B. bacteriovorus* protection. The second front, lagging behind the first, is that at  
159 which matrix and cell-packing have consolidated, conferring lasting protection against invasion by  
160 bacterial predators. Our results imply that the rate of consolidation of this secondary front exceeds the rate  
161 of infiltration and predation by *B. bacteriovorus* on the biofilm periphery, allowing the biofilm to maintain  
162 positive net growth despite grazing by the predator population in the outermost biofilm layer.

163

### 164 ***B. bacteriovorus* predation transforms the landscape of *V. cholerae* biofilm growth**

165 Our results thus far establish a critical cell-packing threshold past which biofilms of *V. cholerae* survive  
166 exposure to *B. bacteriovorus* (Figure 3D-E; SI Figure S3); though the predator can continue grazing on  
167 the outer periphery of these biofilms, the prey cell clusters maintain positive net growth. There are  
168 precedents for this observation, but at much larger spatial scales in the context of forest ecology. Our  
169 findings are analogous to browsing and fire traps well known to limit the recruitment of tree saplings to

170 adult trees – only saplings past a size threshold survive herbivore grazing and fire to become adult  
171 trees<sup>61,62</sup>. Depending on grazing and fire frequency, this effect can generate vastly different distributions  
172 of tree biomass distribution on continental scales<sup>63</sup>. With this analogy in mind we were curious as to the  
173 impact of predation on biofilm distribution: how does exposure to *B. bacteriovorus* influence the sub-  
174 millimeter scale landscape of *V. cholerae* biofilms?

175 We explored this question by repeating the experiment above with a different imaging regime. *V.*  
176 *cholerae* was grown microfluidic devices for 48 h before a single introduction of *B. bacteriovorus*,  
177 followed by a return to predator-free media influx. In control treatments, the same tubing exchanges were  
178 performed, but no predators were introduced. We then imaged the biofilms by confocal microscopy 48 h  
179 later, which revealed dramatic differences between the two treatments. Control chambers contained a wide  
180 distribution of cell cluster sizes (Figure 4A). The frequency distribution of neighborhood biovolume  
181 fraction in this condition was broad with a shallow peak at 0.5 (Figure 4C).

182 Biofilms exposed to *B. bacteriovorus* were strongly shifted toward very large cell clusters that had  
183 reached the ceiling of the chambers and grown into columnar structures, in contrast to the hemispherical  
184 biofilm clusters observed in the control chambers (Figure 4B). We could test whether the difference in  
185 biofilm cluster shape between the two treatments was consistent across all replicates by measuring the  
186 ratio of biomass at the base of biofilm clusters to that at the chamber mid-plane. This ratio was ~2 in  
187 control chambers but transitioned to 1 in predator-exposed chambers, reflecting the change from  
188 hemispherical to columnar cell groups (Figure 4D). The distribution of neighborhood volume fraction for  
189 predator-exposed chambers showed a pronounced shift toward high values in the range of 0.8, the critical  
190 cutoff identified above for protection from predator attack (Figure 4C). This shift occurred quickly, within  
191 the first 16 hours after predator exposure (SI Figure S6). In chambers with predators introduced, the space  
192 around large clusters was mostly unoccupied, presumably due to killing by *B. bacteriovorus*, which  
193 contrasted sharply with control chambers in which areas surrounding cell clusters were occupied by  
194 nascent biofilm clusters or cell monolayers (SI Figure S7).

195

### 196 ***B. bacteriovorus* exposure alters biofilm surface structure and allows infiltration by newly arriving** 197 **bacteria**

198 An additional observation from our long-term imaging experiments was that among biofilm clusters which  
199 survive predator-exposure, their outermost layers – which remained susceptible to *B. bacteriovorus* – look  
200 to be more loosely packed and porous than those of biofilms in the control condition (Figure 4A-B). Cell



201 packing in the exterior of biofilms is an important element of a community barrier function in *V. cholerae*  
202 and other microbes, which protects against intra- and inter-specific infiltration<sup>21,28</sup>. Typically, *V. cholerae*  
203 biofilms rarely allow for successful surface colonization by other bacteria, and they are extremely resistant  
204 to enter into their interior<sup>21,28</sup>. The packing architecture that confers this protection is a result of cell-matrix  
205 and cell-cell interactions which altogether form the basis of structural strength in their biofilms. We  
206 hypothesized that by killing a fraction of cells on the biofilm exterior layer, *B. bacteriovorus* partially  
207 compromises this packing architecture, perhaps rendering them less resistant to entry by other bacteria  
208 including conspecific competitors. To test this idea, we once again grew *V. cholerae* biofilms for 48 hours  
209 and subjected them to a single dose of *B. bacteriovorus*. 48 hours later, we introduced new competitors to  
210 the environment in the form of an isogenic *V. cholerae* strain that produced a different fluorescent protein  
211 than the resident biofilm, so the two could be distinguished from each other and the predatory cells.

212 In control chambers without predator exposure, resident biofilms blocked invasion of newly  
213 introduced cells: as seen previously<sup>21</sup>, few invaders could be found on the biofilm outer surface, and none  
214 made it into the biofilm interior (Figure 5A, D). In contrast, predator-exposed biofilms permitted  
215 substantial infiltration of competitors past their outer boundaries (Figure 5B-D). Quantifying these results  
216 by image analysis, invasion of competitors into predator-exposed biofilms was 40-fold greater than that  
217 of control biofilms (Figure 5E). Areas of resident biofilms with many *B. bacteriovorus* cells present also  
218 appeared to have a high density of invading cells (Figure 5C,D). To quantify this observation, we  
219 measured the localized signal intensity of invading cells surrounding resident cells and compared this  
220 metric with the localized degree of predation by *B. bacteriovorus*. We found a linear correlation between  
221 the number of invading cells present in a given area as a function of how much predation that area had  
222 experienced (Figure 5F). This outcome is consistent with our hypothesis that *B. bacteriovorus* predation  
223 disrupts local biofilm architecture and renders it more openly exposed to entry by other cells. In this  
224 respect *B. bacteriovorus* not only alters the structure of the outermost biofilm front but also fundamentally  
225 changes the ecology of biofilm assembly as new and potentially competing (but-non-predatory) cells enter  
226 the system.

227

## 228 **Discussion**

229 Predator-prey interactions in the context of microbial biofilms are almost certainly widespread in nature;  
230 we are only in the early stages of understanding the micrometer-scale processes that determine the  
231 outcome of these encounters, the underlying molecular mechanisms of these encounters, and the



232 consequences for microbial ecology and evolution. Major steps forward have recently been made to  
233 understand phage-biofilm interaction<sup>16,28,64,65</sup>, and landmark papers have begun to characterize predation  
234 by larger protist predators and cells of metazoan immune systems<sup>23,66–68</sup> at high resolution. Biofilm  
235 grazing by metazoans has been studied, but primarily at macroscopic scales<sup>69–71</sup>. *B. bacteriovorus*, a  
236 ubiquitous threat to prey bacteria, has been investigated interacting with biofilms, but again primarily via  
237 macroscopic assays<sup>43,52</sup>. Here we build on this foundation with the first single-cell resolution live imaging  
238 of *B. bacteriovorus* preying upon biofilms of *V. cholerae*. The *V. cholerae* cell-cell packing threshold that  
239 we discovered, past which predators are not able to access their prey, reveals novel insights into the  
240 mechanisms of architecture maturation, and it leads to fundamental transformations of biofilm structure  
241 and community assembly.

242 We hope to have demonstrated that high-resolution imaging and analysis of predator-prey  
243 interactions inside biofilms is a critical area open for further investigation in light of the enormous  
244 diversity of predator types and biofilm structure, and their potential influence on each other. Prior work  
245 has intimated, for example, that *B. bacteriovorus* is able to kill whole biofilms of *E. coli* and *P. aeruginosa*,  
246 even after the prey have produced relatively large cell groups<sup>43,52</sup>. Understanding the key determinants of  
247 successful predation of prey biofilms will be important for our knowledge of the natural history of biofilm  
248 formation in different species, and also for the potential uses of *B. bacteriovorus* as an antimicrobial  
249 therapeutic.

250

### 251 **Author Contributions**

252 CDN and DEK conceived the project. CDN supervised the project. CDN and BRW designed experiments.  
253 BRW performed experiments and image processing of microscopy data. CDN and BRW analyzed data.  
254 DEK and MS provided reagents/tools. CDN and BRW wrote the paper with input from DEK.

255

### 256 **Acknowledgements**

257 We thank R.W. Baker, A. Persat, N. Rigel, B. Ross, D. Schultz, and members of the Nadell Lab for their  
258 comments and suggestions on earlier versions of this manuscript. BRW is supported by a Gilman  
259 Fellowship from the Department of Biological Sciences at Dartmouth. CDN is supported by NSF grant  
260 MCB 1817342, NSF grant IOS 2017879, a Burke Award from Dartmouth, NIH grant 2R01AI081838 to  
261 PI Robert Cramer, NIH grant P20-GM113132 to the Dartmouth BioMT COBRE, and grant  
262 RGY0077/2020 from the Human Frontier Science Foundation with co-PI A. Persat.

263 **References**

- 264 1. Flemming, H.-C. *et al.* Biofilms: an emergent form of bacterial life. *Nat. Rev. Microbiol.* **14**, 563–575  
265 (2016).
- 266 2. Yildiz, F. H. & Visick, K. L. Vibrio biofilms: so much the same yet so different. *Trends Microbiol.*  
267 **17**, 109–118 (2009).
- 268 3. Drescher, K. *et al.* Architectural transitions in Vibrio cholerae biofilms at single-cell resolution. *Proc.*  
269 *Natl. Acad. Sci.* **113**, E2066–E2072 (2016).
- 270 4. Datta, M. S., Sliwerska, E., Gore, J., Polz, M. F. & Cordero, O. X. Microbial interactions lead to rapid  
271 micro-scale successions on model marine particles. *Nat. Commun.* **7**, 11965–11965 (2016).
- 272 5. Ebrahimi, A., Schwartzman, J. & Cordero, O. X. Cooperation and spatial self-organization determine  
273 rate and efficiency of particulate organic matter degradation in marine bacteria. *Proc. Natl. Acad. Sci.*  
274 **116**, 23309–23316 (2019).
- 275 6. Enke, T. N., Leventhal, G. E., Metzger, M., Saavedra, J. T. & Cordero, O. X. Microscale ecology  
276 regulates particulate organic matter turnover in model marine microbial communities. *Nat. Commun.*  
277 **9**, 2743 (2018).
- 278 7. Philippot, L., Raaijmakers, J. M., Lemanceau, P. & van der Putten, W. H. Going back to the roots: the  
279 microbial ecology of the rhizosphere. *Nat. Rev. Microbiol.* **11**, 789–799 (2013).
- 280 8. Byrd, A. L., Belkaid, Y. & Segre, J. A. The human skin microbiome. *Nat. Rev. Microbiol.* **16**, 143–  
281 155 (2018).
- 282 9. Coyte, K. Z., Schluter, J. & Foster, K. R. The ecology of the microbiome: Networks, competition, and  
283 stability. *Science* **350**, 663–666 (2015).
- 284 10. Meibom, K. L. *et al.* The Vibrio cholerae chitin utilization program. *Proc. Natl. Acad. Sci.* **101**, 2524–  
285 2529 (2004).
- 286 11. Hayes, C. A., Dalia, T. N. & Dalia, A. B. Systematic genetic dissection of chitin degradation and  
287 uptake in Vibrio cholerae. *Environ. Microbiol.* **19**, 4154–4163 (2017).
- 288 12. Davey, M. E. & O’toole, G. A. Microbial Biofilms: from Ecology to Molecular Genetics. *Microbiol.*  
289 *Mol. Biol. Rev.* **64**, 847–867 (2000).
- 290 13. Dang, H. & Lovell, C. R. Microbial Surface Colonization and Biofilm Development in Marine  
291 Environments. *Microbiol. Mol. Biol. Rev. MMBR* **80**, 91–138 (2016).
- 292 14. Yan, J., Sharo, A. G., Stone, H. A., Wingreen, N. S. & Bassler, B. L. Vibrio cholerae biofilm growth  
293 program and architecture revealed by single-cell live imaging. *Proc. Natl. Acad. Sci.* **113**, E5337–  
294 E5343 (2016).
- 295 15. Drescher, K., Nadell, C. D., Stone, H. A., Wingreen, N. S. & Bassler, B. L. Solutions to the Public  
296 Goods Dilemma in Bacterial Biofilms. *Curr. Biol.* **24**, 50–55 (2014).
- 297 16. Vidakovic, L., Singh, P. K., Hartmann, R., Nadell, C. D. & Drescher, K. Dynamic biofilm architecture  
298 confers individual and collective mechanisms of viral protection. *Nat. Microbiol.* **3**, 26–31 (2018).
- 299 17. Martínez-García, R., Nadell, C. D., Hartmann, R., Drescher, K. & Bonachela, J. A. Cell adhesion and  
300 fluid flow jointly initiate genotype spatial distribution in biofilms. *PLOS Comput. Biol.* **14**, e1006094–  
301 e1006094 (2018).
- 302 18. Nadell, C. D. & Bassler, B. L. A fitness trade-off between local competition and dispersal in Vibrio  
303 cholerae biofilms. *Proc. Natl. Acad. Sci.* **108**, 14181–14185 (2011).

- 304 19. Nadell, C. D., Drescher, K. & Foster, K. R. Spatial structure, cooperation and competition in biofilms.  
305 *Nat. Rev. Microbiol.* **14**, 589–600 (2016).
- 306 20. Schluter, J., Nadell, C. D., Bassler, B. L. & Foster, K. R. Adhesion as a weapon in microbial  
307 competition. *ISME J.* **9**, 139–49 (2015).
- 308 21. Nadell, C. D., Drescher, K., Wingreen, N. S. & Bassler, B. L. Extracellular matrix structure governs  
309 invasion resistance in bacterial biofilms. *ISME J.* **9**, 1700–1709 (2015).
- 310 22. Santos-Lopez, A., Marshall, C. W., Scribner, M. R., Snyder, D. & Cooper, V. S. Evolutionary  
311 pathways to antibiotic resistance are dependent upon environmental structure and bacterial lifestyle.  
312 *bioRxiv* 581611 (2019) doi:10.1101/581611.
- 313 23. Matz, C. *et al.* Biofilm formation and phenotypic variation enhance predation-driven persistence of  
314 *Vibrio cholerae*. *Proc. Natl. Acad. Sci.* **102**, 16819–16824 (2005).
- 315 24. Chen, H. & Williams, H. N. Sharing of prey: coinfection of a bacterium by a virus and a prokaryotic  
316 predator. *mBio* **3**, e00051-00012 (2012).
- 317 25. Seiler, C. *et al.* Grazing resistance of bacterial biofilms: a matter of predators' feeding trait. *FEMS*  
318 *Microbiol. Ecol.* **93**, (2017).
- 319 26. Tseng, B. S. *et al.* The extracellular matrix protects *Pseudomonas aeruginosa* biofilms by limiting the  
320 penetration of tobramycin. *Environ. Microbiol.* **15**, 2865–2878 (2013).
- 321 27. Doroshenko, N. *et al.* Extracellular DNA impedes the transport of vancomycin in *Staphylococcus*  
322 *epidermidis* biofilms preexposed to subinhibitory concentrations of vancomycin. *Antimicrob. Agents*  
323 *Chemother.* **58**, 7273–7282 (2014).
- 324 28. Díaz-Pascual, F. *et al.* Breakdown of *Vibrio cholerae* biofilm architecture induced by antibiotics  
325 disrupts community barrier function. *Nat. Microbiol.* **4**, 2136–2145 (2019).
- 326 29. Simmons, E. L. *et al.* Biofilm Structure Promotes Coexistence of Phage-Resistant and Phage-  
327 Susceptible Bacteria. *mSystems* **5**, (2020).
- 328 30. Simmons, M., Drescher, K., Nadell, C. D. & Bucci, V. Phage mobility is a core determinant of phage-  
329 bacteria coexistence in biofilms. *ISME J.* **12**, 531–543 (2018).
- 330 31. Wieczorek, A. S. *et al.* Ecological Functions of Agricultural Soil Bacteria and Microeukaryotes in  
331 Chitin Degradation: A Case Study. *Front. Microbiol.* **10**, 1293 (2019).
- 332 32. Williams, L. E. *et al.* Variation in genome content and predatory phenotypes between *Bdellovibrio*  
333 *sp.* NC01 isolated from soil and *B. bacteriovorus* type strain HD100. *Microbiology*, **165**, 1315–1330  
334 (2019).
- 335 33. Li, N. & Williams, H. N. 454 Pyrosequencing reveals diversity of *Bdellovibrio* and like organisms in  
336 fresh and salt water. *Antonie Van Leeuwenhoek* **107**, 305–311 (2015).
- 337 34. de Dios Caballero, J. *et al.* Individual Patterns of Complexity in Cystic Fibrosis Lung Microbiota,  
338 Including Predator Bacteria, over a 1-Year Period. *mBio* **8**, (2017).
- 339 35. Shatzkes, K. *et al.* Effect of predatory bacteria on the gut bacterial microbiota in rats. *Sci. Rep.* **7**,  
340 43483 (2017).
- 341 36. Duncan, M. C. *et al.* High-Throughput Analysis of Gene Function in the Bacterial Predator  
342 *Bdellovibrio bacteriovorus*. *mBio* **10**, (2019).

- 343 37. Rendulic, S. *et al.* A predator unmasked: life cycle of *Bdellovibrio bacteriovorus* from a genomic  
344 perspective. *Science* **303**, 689–692 (2004).
- 345 38. Duncan, M. C. *et al.* *Vibrio cholerae* motility exerts drag force to impede attack by the bacterial  
346 predator *Bdellovibrio bacteriovorus*. *Nat. Commun.* **9**, 4757 (2018).
- 347 39. Sockett, R. E. Predatory lifestyle of *Bdellovibrio bacteriovorus*. *Annu. Rev. Microbiol.* **63**, 523–539  
348 (2009).
- 349 40. Roschanski, N., Klages, S., Reinhardt, R., Linscheid, M. & Strauch, E. Identification of genes essential  
350 for prey-independent growth of *Bdellovibrio bacteriovorus* HD100. *J. Bacteriol.* **193**, 1745–1756  
351 (2011).
- 352 41. Kuru, E. *et al.* Fluorescent D-amino-acids reveal bi-cellular cell wall modifications important for  
353 *Bdellovibrio bacteriovorus* predation. *Nat. Microbiol.* **2**, 1648–1657 (2017).
- 354 42. Willis, A. R. *et al.* Injections of Predatory Bacteria Work Alongside Host Immune Cells to Treat  
355 *Shigella* Infection in Zebrafish Larvae. *Curr. Biol. CB* **26**, 3343–3351 (2016).
- 356 43. Kadouri, D. & O’Toole, G. A. Susceptibility of Biofilms to *Bdellovibrio bacteriovorus* Attack. *Appl.*  
357 *Environ. Microbiol.* **71**, 4044–4051 (2005).
- 358 44. Fry, J. C. & Staples, D. G. Distribution of *Bdellovibrio bacteriovorus* in sewage works, river water,  
359 and sediments. *Appl. Environ. Microbiol.* **31**, 469–474 (1976).
- 360 45. Williams, H. N. *et al.* Recovery of bdellovibrios from submerged surfaces and other aquatic habitats.  
361 *Microb. Ecol.* **29**, 39–48 (1995).
- 362 46. Chauhan, A. & Williams, H. N. Biostimulation of estuarine microbiota on substrate coated agar slides:  
363 a novel approach to study diversity of autochthonous *Bdellovibrio*- and like organisms. *Microb. Ecol.*  
364 **55**, 640–650 (2008).
- 365 47. Schoeffield, A. J. & Williams, H. N. Efficiencies of Recovery of *Bdellovibrios* from Brackish- Water  
366 Environments by Using Various Bacterial Species as Prey. *Appl. Environ. Microbiol.* **56**, 230–236  
367 (1990).
- 368 48. Kelley, J. I. & Williams, H. N. *Bdellovibrios* in *Callinectes sapidus*, the Blue Crab. *Appl. Environ.*  
369 *Microbiol.* **58**, 1408–1410 (1992).
- 370 49. Kelley, J. I., Turng, B., Williams, H. N. & Baer, M. L. Effects of temperature, salinity, and substrate  
371 on the colonization of surfaces in situ by aquatic bdellovibrios. *Appl. Environ. Microbiol.* **63**, 84–90  
372 (1997).
- 373 50. Otto, S., Bruni, E. P., Harms, H. & Wick, L. Y. Catch me if you can: dispersal and foraging of  
374 *Bdellovibrio bacteriovorus* 109J along mycelia. *ISME J.* **11**, 386–393 (2017).
- 375 51. Lambert, C., Fenton, A. K., Hopley, L. & Sockett, R. E. Predatory *Bdellovibrio* bacteria use gliding  
376 motility to scout for prey on surfaces. *J. Bacteriol.* **193**, 3139–3141 (2011).
- 377 52. Kadouri, D., Venzon, N. C. & O’Toole, G. A. Vulnerability of Pathogenic Biofilms to *Micavibrio*  
378 *aeruginosavorus*. *Appl. Environ. Microbiol.* **73**, 605–614 (2007).
- 379 53. Richards, G. P. *et al.* Predatory bacteria as natural modulators of *Vibrio parahaemolyticus* and *Vibrio*  
380 *vulnificus* in seawater and oysters. *Appl. Environ. Microbiol.* **78**, 7455–7466 (2012).
- 381 54. Berk, V. *et al.* Molecular Architecture and Assembly Principles of *Vibrio cholerae* Biofilms. *Science*  
382 **337**, 236–239 (2012).

- 383 55. Fong, J. C. *et al.* Structural dynamics of RbmA governs plasticity of *Vibrio cholerae* biofilms. *eLife*  
384 **6**, (2017).
- 385 56. Jones, C. J. *et al.* C-di-GMP Regulates Motile to Sessile Transition by Modulating MshA Pili  
386 Biogenesis and Near-Surface Motility Behavior in *Vibrio cholerae*. *PLOS Pathog.* **11**, e1005068–  
387 e1005068 (2015).
- 388 57. Giglio, K. M., Fong, J. C., Yildiz, F. H. & Sondermann, H. Structural Basis for Biofilm Formation via  
389 the *Vibrio cholerae* Matrix Protein RbmA. *J. Bacteriol.* **195**, 3277–3286 (2013).
- 390 58. Fong, J. C. N. & Yildiz, F. H. The *rbmBCDEF* Gene Cluster Modulates Development of Rugose  
391 Colony Morphology and Biofilm Formation in *Vibrio cholerae*. *J. Bacteriol.* **189**, 2319–2330 (2007).
- 392 59. Beyhan, S. & Yildiz, F. H. Smooth to rugose phase variation in *Vibrio cholerae* can be mediated by a  
393 single nucleotide change that targets c-di-GMP signalling pathway. *Mol. Microbiol.* **63**, 995–1007  
394 (2007).
- 395 60. Yildiz, F. H., Liu, X. S., Heydorn, A. & Schoolnik, G. K. Molecular analysis of rugosity in a *Vibrio*  
396 *cholerae* O1 El Tor phase variant. *Mol. Microbiol.* **53**, 497–515 (2004).
- 397 61. Staver, A. C. & Bond, W. J. Is there a ‘browse trap’? Dynamics of herbivore impacts on trees and  
398 grasses in an African savanna. *J. Ecol.* **102**, 595–602 (2014).
- 399 62. Staver, A. C., Archibald, S. & Levin, S. Tree cover in sub-Saharan Africa: Rainfall and fire constrain  
400 forest and savanna as alternative stable states. *Ecology* **92**, 1063–1072 (2011).
- 401 63. Staver, A. C., Archibald, S. & Levin, S. A. The Global Extent and Determinants of Savanna and Forest  
402 as Alternative Biome States. *Science* **334**, 230–232 (2011).
- 403 64. Darch, S. E. *et al.* Phage Inhibit Pathogen Dissemination by Targeting Bacterial Migrants in a Chronic  
404 Infection Model. *mBio* **8**, (2017).
- 405 65. Dunsing, V., Irmscher, T., Barbirz, S. & Chiantia, S. Purely Polysaccharide-Based Biofilm Matrix  
406 Provides Size-Selective Diffusion Barriers for Nanoparticles and Bacteriophages. *Biomacromolecules*  
407 **20**, 3842–3854 (2019).
- 408 66. Thurlow, L. R. *et al.* *Staphylococcus aureus* biofilms prevent macrophage phagocytosis and attenuate  
409 inflammation in vivo. *J. Immunol. Baltim. Md 1950* **186**, 6585–6596 (2011).
- 410 67. Van der Henst, C., Scignari, T., Maclachlan, C. & Blokesch, M. An intracellular replication niche for  
411 *Vibrio cholerae* in the amoeba *Acanthamoeba castellanii*. *ISME J.* **10**, 897–910 (2016).
- 412 68. Van der Henst, C. *et al.* Molecular insights into *Vibrio cholerae* ’s intra-amoebal host-pathogen  
413 interactions. *Nat. Commun.* **9**, 3460 (2018).
- 414 69. Burlinson, P. *et al.* *Pseudomonas fluorescens* NZI7 repels grazing by *C. elegans* , a natural predator.  
415 *ISME J.* **7**, 1126–1138 (2013).
- 416 70. DePas, W. H. *et al.* Biofilm Formation Protects *Escherichia coli* against Killing by *Caenorhabditis*  
417 *elegans* and *Myxococcus xanthus*. *Appl. Environ. Microbiol.* **80**, 7079–7087 (2014).
- 418 71. Thutupalli, S. *et al.* Farming and public goods production in *Caenorhabditis elegans* populations.  
419 *Proc. Natl. Acad. Sci.* **114**, 2289–2294 (2017).
- 420
- 421



422 **Figures**

423

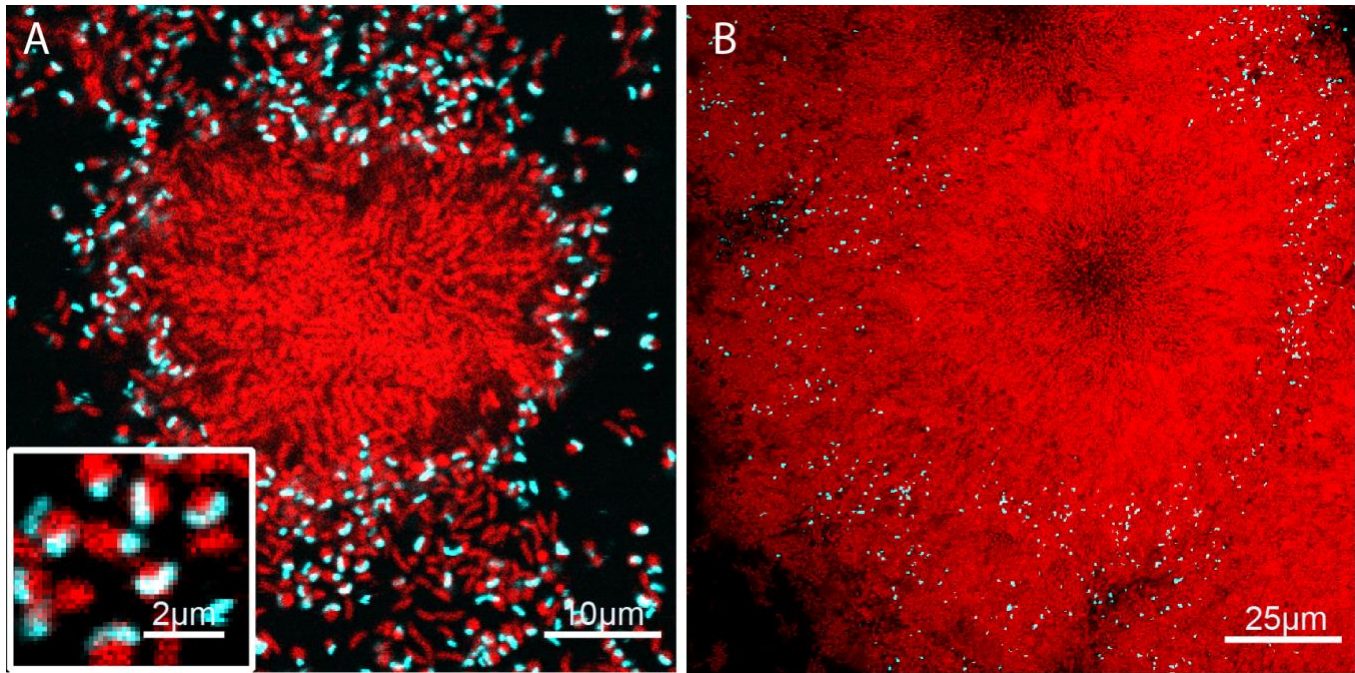

424

425 **Figure 1. An illustration *V. cholerae* biofilm clusters following *B. bacteriovorus* exposure.** Prey  
426 biofilms (red) were grown for 48 h prior to exposure to predator cells (cyan). (A) 30 min after introduction,  
427 predator cells have preyed upon singleton cells, forming bdelloplasts (inset). Predator cells also appear  
428 able to access hosts on the periphery, but not within the innermost regions, of *V. cholerae* host biofilm  
429 clusters. (B) 48 hours after introduction, *V. cholerae* demonstrates net positive growth, trapping *B.*  
430 *bacteriovorus* in the expanding front.



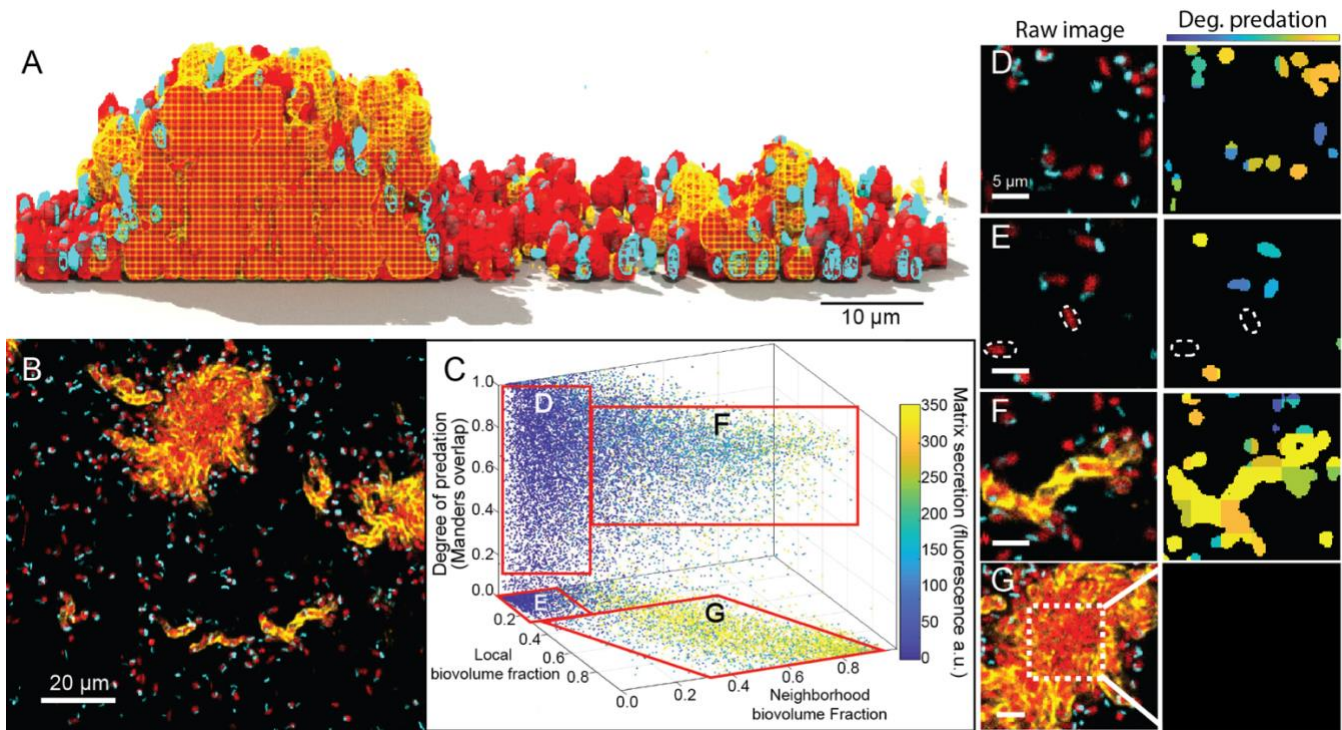

431  
432

433 **Figure 2. Image cytometry analysis of *V. cholerae* biofilm matrix secretion, cell packing**  
434 **architecture, and susceptibility to *B. bacteriovorus* predation.** (A) A 3-D rendering of *V. cholerae*  
435 biofilms (red), secreted matrix (yellow), and *B. bacteriovorus* (cyan) showing a vertical cross section of  
436 the biofilm 2 hours after the introduction of predators. The matrix is rendered as a mesh to help visualize  
437 the embedded cells. (B) Raw fluorescence image showing a horizontal cross section of the matrix-labeled  
438 biofilm (same color scheme and timepoint as in panel A). (C) Image analysis of biofilms exposed to  
439 predatory bacteria after 2 hours. The X and Y axes denote local and neighborhood biovolume fraction,  
440 respectively. The vertical axis denotes the degree of predation. Any points off the bottom plane denote  
441 host cells in the process of being killed by predatory bacteria. Data points are color-coded according to  
442 local matrix fluorescence intensity. (D-G) Raw images and corresponding heat maps for degree of  
443 predation. In the raw images at left, host cells are red, predators are cyan, and matrix is yellow. In the  
444 heatmaps at right, blue/teal indicates a predator cell attached to a host cell, and orange/yellow indicates  
445 a predator cell is inside the host. (D) isolated singleton cells are fully exposed and tend to be killed off by  
446 *B. bacteriovorus*, though some singleton cells have not yet been found by a predator, highlighted by the  
447 dotted outlines in (E). (F) Small biofilm clusters that are producing extracellular matrix are nevertheless  
448 fully susceptible to predation. (G) Though the periphery regions of large biofilm clusters are still  
449 susceptible to predation – as in (F) – the internal regions of these clusters with high cell-packing are fully  
450 protected.

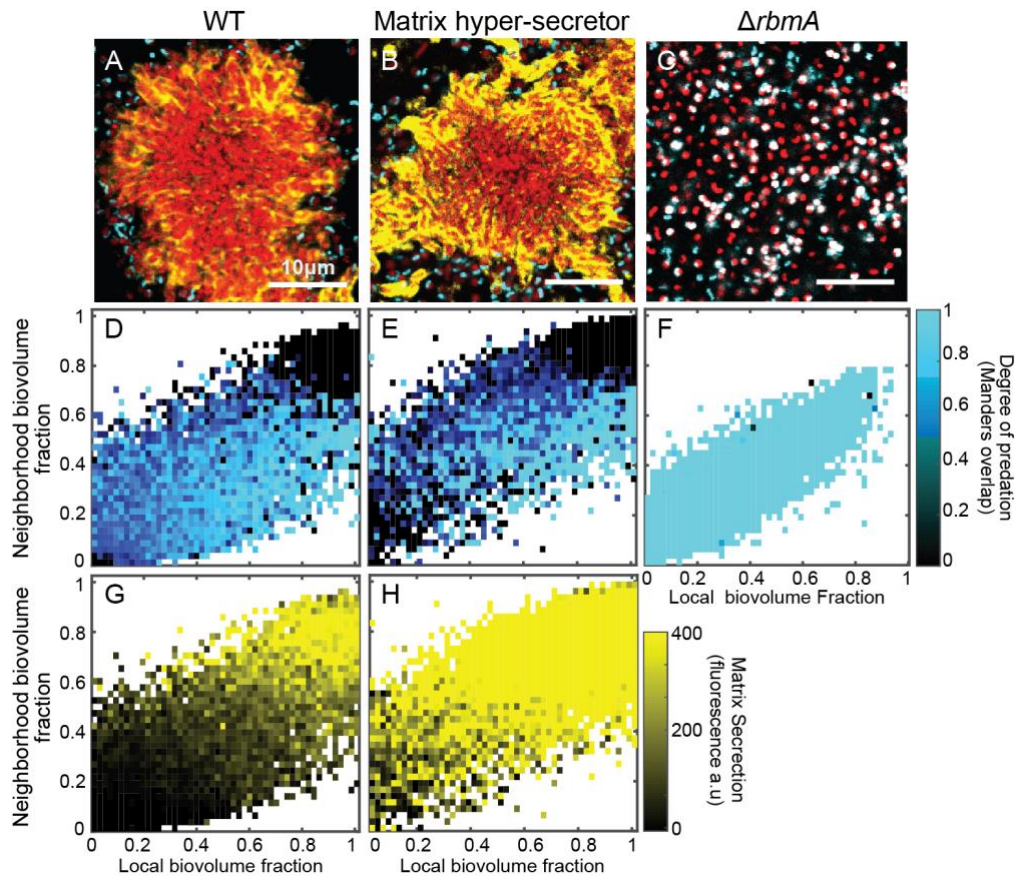

451

452 **Figure 3. A critical threshold of neighborhood biovolume fraction correlates with host cell protection**  
453 **from predation.** (A-C) Images of *V. cholerae* biofilm clusters of wild type, matrix hyper-secreting, and  
454  $\Delta rbmA$  strains 2 hours after predator introduction. *V. cholerae* cells are shown in red, immunostained  
455 RbmA-FLAG is shown in yellow, and *B. bacteriovorus* is shown in cyan. Biofilms were segmented and  
456 analyzed by dissecting the total system into a cubic grid as detailed in the main text. The segmented  
457 biovolumes in each grid are analyzed individually to produce the kymographs described below. (D-F)  
458 Heatmap plots for the degree of predation in biofilms of the three strains shown in (A-C), respectively.  
459 The horizontal axis denotes local biovolume fraction, and the vertical axis denotes neighborhood  
460 biovolume fraction. Black squares correspond to biofilm volume units that are protected from predation;  
461 dark blue squares denote areas with predation initiating at the cell exterior; and light blue squares denote  
462 areas fully predated. Note the critical threshold neighborhood volume fraction of approximate 0.8 past  
463 which biofilms are protected from predation. (G-H) Heatmaps plots for the degree of matrix accumulation  
464 in biofilms of the two strains shown in (A-B), respectively. There is no entry for the  $\Delta rbmA$  strain, because  
465 it cannot produce the matrix protein being immunostained. Axes are as for (D-F). The black-to-yellow  
466 scaling relates the matrix accumulation for each point. Note in comparing (E) and (H) in particular that  
467 high matrix production by itself does not confer predator protection; rather matrix-replete regions of the  
468 biofilm must first reach the critical neighborhood cell packing threshold before predators can be excluded.

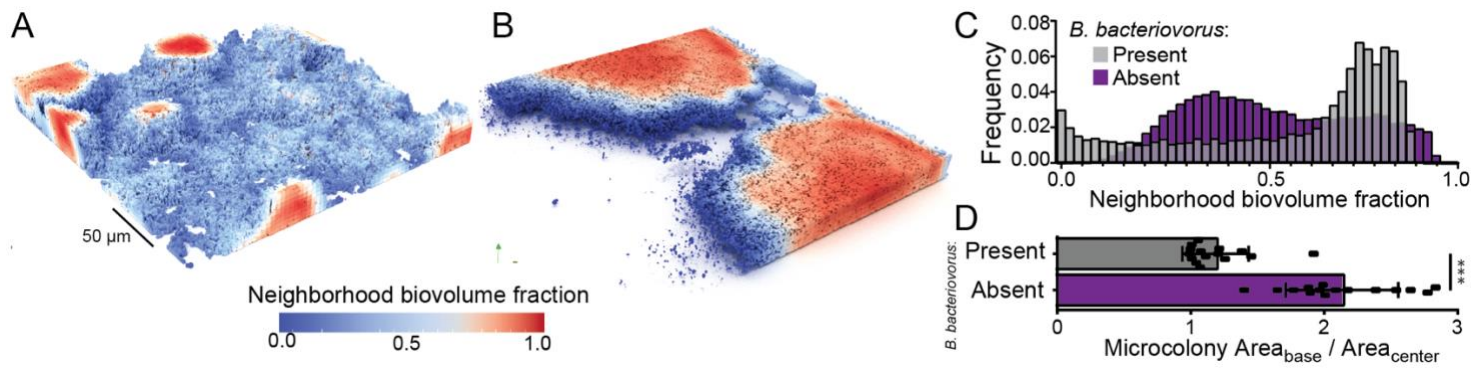

469  
470

471 **Figure 4. Exposure to predation by *B. bacteriovorus* shifts the microscopic landscape of host**  
472 **biofilms.** A) In the absence of predatory bacteria, *V. cholerae* produces biofilms with abundant small  
473 clusters with high internal neighbor volume fraction and low peripheral neighborhood volume fraction.  
474 B) Under predation by *B. bacteriovorus*, single cells and small colonies below a neighborhood cell-  
475 packing threshold are exposed and killed, leaving few remaining clusters which are then free to grow very  
476 large. C) Frequency distributions of neighborhood volume fraction for biofilms exposed or unexposed to  
477 *B. bacteriovorus* predation. Biofilms with predators present show a strong shift toward high neighborhood  
478 volume fraction. D) Quantification of the average ratio of basal area to mid-plane area for biofilms with  
479 and without exposure to predators. Exposed biofilms, because they have room to grow into much larger  
480 columnar structures, have a ratio of ~1; while in unexposed biofilms, clusters compete more for space and  
481 remain semispherical, such they are larger at their base than they are at their mid-plane.



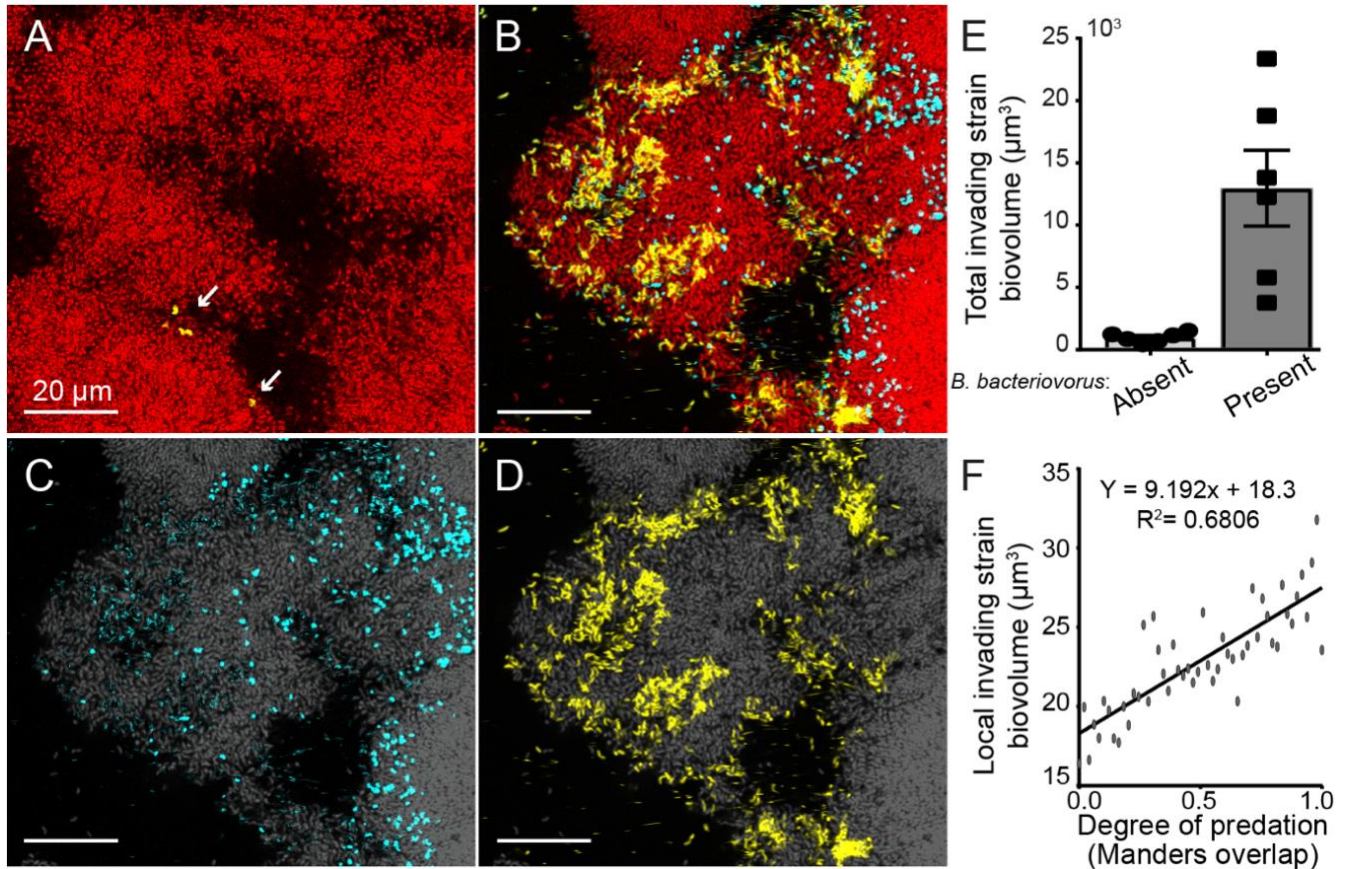

482

483 **Figure 5. *B. bacteriovorus* exposure on the periphery of *V. cholerae* biofilm clusters renders them susceptible**  
484 **to infiltration by other bacteria.** (A) In the absence of predator exposure, *V. cholerae* biofilms are highly resistant  
485 to invasion by conspecific cells. The resident biofilm is shown in red, and invading cells are shown in yellow. (B)  
486 Resident biofilms that have been exposed to predation by *B. bacteriovorus* (blue) have a more loosely structured  
487 periphery, and as a result, invading conspecifics are able to enter well past the outer boundary of the resident biofilm.  
488 (C) Image of the predator bacteria (blue) and (D) invading conspecific cells (yellow) distributed in the outer resident  
489 biofilm layers (resident biofilm in grey). (E) Measurement of the differences in total invading cell biovolume across  
490 the whole biofilm, in the absence or presence of *B. bacteriovorus*. (F) Within biofilms exposed to predation, the  
491 degree of invasion within any given local area scales linearly with the degree of predation in that area.

492 **Supplementary Information**

493

494 **Predation by *Bdellovibrio bacteriovorus* transforms the landscape**  
495 **and community assembly of bacterial biofilms**

496

497

498 Benjamin R. Wucher<sup>1</sup>, Mennat Elsayed<sup>2</sup>, Daniel E. Kadouri<sup>2</sup>, Carey D. Nadell<sup>1</sup>

499

500 <sup>1</sup> Department of Biological Sciences, Dartmouth, Hanover, NH, USA

501 <sup>2</sup> Department of Oral Biology, Rutgers School of Dental Medicine, Newark, NJ, USA

502

503 Correspondence to:

504 [carey.d.nadell@dartmouth.edu](mailto:carey.d.nadell@dartmouth.edu)

## 505 **Supplemental Materials and Methods**

506

### 507 **Strains and media**

508 The full strain and plasmid list for this study can be found in **Table S1**. Prior to experiments, *V. cholerae*  
509 strains were grown overnight in lysogeny broth (LB) in a shaking incubator. *B. bacteriovorus* stocks were  
510 obtained via co-culture with prey and subsequent filtering. A full outline of the methods has been  
511 described previously<sup>1</sup>. Modifications to *V. cholerae* were made using *E. coli* strain S-17- $\lambda$ pir carrying the  
512 allelic exchange vector pBW1 as previously described<sup>2</sup>. Antibiotics and reagents used for counter  
513 selection were the following concentrations: 100 $\mu$ g/ml ampicillin, 50 $\mu$ g/ml kanamycin, 50 $\mu$ g/ml  
514 polymyxin B, 5% sucrose. All reagents were obtained from Millipore sigma unless otherwise stated.

515

### 516 **Microfluidic assembly**

517 Poly-dimethylsiloxane (PDMS) was used to cast microfluidic chambers using standard soft lithography  
518 techniques<sup>3,4</sup>. The chambers were bonded to #1.5 coverslips measuring 36mm by 60 mm (WxL). The  
519 chambers used for this study had dimensions of 3000 $\mu$ m x 500 $\mu$ m x 75 $\mu$ m (LxWxD). In order to run  
520 media through these chambers 1ml of M9 with 0.5% glucose was loaded into 1mL BD plastic syringes.  
521 25 gauge needles were affixed to the syringes and #30 Cole Palmer PTFE tubing with an inner diameter  
522 of 0.3mm was placed over the end of the needle. The other end of this tubing was then placed into pre-  
523 bored holes in the microfluidic device. An additional length of tubing was run from the auxiliary channels  
524 in the device to a vacuum line, thereby preventing bubbles from entering the system. Syringes were  
525 mounted Pico Plus Syringe Pumps (Harvard Apparatus)

526

### 527 **Biofilm growth conditions and matrix staining**

528 Biofilms were grown in the microfluidic chambers described above. Overnight cultures of *V. cholerae*  
529 were back-diluted into M9 minimal medium with 0.5% glucose and allowed to re-enter exponential phase  
530 ( $OD_{600} = 1.0$ ) to acclimate to the media conditions used for biofilm growth (i.e. M9 minimal media with  
531 0.5% glucose). These cultures were inoculated into chambers without flow to allow surface colonization  
532 for 1 h. After this period a flow rate of 0.2 $\mu$ L/min was established for the remainder of the experiment.  
533 All experiments were performed at room temperature. For matrix staining experiments in which *V.*  
534 *cholerae* harbored C-terminal fusion of 3xFLAG to RbmA, an anti-FLAG antibody conjugated to a Cy3  
535 fluorophore added to the influx medium (M9 minimal with 0.5% glucose) at 1 $\mu$ g/ml.

536

### 537 **Introduction of predators and invaders**

538 Introduction of predators was done in a similar fashion to the chamber colonization of *V. cholerae*. *B.*  
539 *bacteriovorus* cultures were diluted to an  $OD_{600}$  of 0.5 ( $2.5 \times 10^9$  PFU/mL) before being inoculated into  
540 the chamber. To do this, the media tubing was briefly removed, and the *B. bacteriovorus* was inoculated  
541 into the culture via a micropipette. The media tubing was then returned to its position, and flow was  
542 resumed 30 minutes after introduction of predators. For experiments in which biofilms were challenged  
543 with conspecific invading *V. cholerae*, a similar regime was carried out. Overnight culture of *V. cholerae*  
544 housing a different fluorescent protein than the resident biofilms was diluted to an  $OD_{600}$  of 1 and then  
545 inoculated into the chambers. Tubing was replaced and flow was resumed 30 minutes after inoculation.

546

### 547 **Microscopy**

548 Imaging of the biofilms was performed with a Zeiss LSM 880 laser scanning confocal microscope. The  
549 microscope used either a 40x /1.2 N.A. water objective or a 10x/ 0.4 N.A. water objective. A 488-nm laser  
550 line was used to excite the GFP contained in the *B. bacteriovorus*. To Image *V. cholerae*, a 594-nm laser



551 was used to excite mKate2 in the resident strain and a 543-nm laser was used to excite mKO- $\kappa$  for the  
 552 invading strain. This 543-nm laser was also used to excite the Cy-3 Fluorophore on the anti-FLAG  
 553 antibody for matrix staining.

554

### 555 **Image Analysis**

556 To obtain data for image analysis, several image stacks were taken at independent locations within each  
 557 chamber. These image stacks were then analyzed using the framework BiofilmQ. A detailed explanation  
 558 of BiofilmQ can be found in several previous studies<sup>5,6</sup>.

559

### 560 **3D renderings**

561 3D renderings were created by first using the VTK output feature present in BiofilmQ. These files could  
 562 then be processed in ParaView and rendered using Osprey ray tracing.

563

### 564 **Statistics**

565 Statistical analyses were performed in GraphPad prism. All pairwise comparisons were made using  
 566 Wilcoxon signed ranks test with Bonferroni correction. Differences between frequency distributions were  
 567 compared via Kolmogorov-Smirnov tests.

568

569

570

**Table S1 Strains and plasmids**

| Strain                         | Relevant markers/ Genotypes                                                           | Source     |
|--------------------------------|---------------------------------------------------------------------------------------|------------|
| <b><i>E. coli</i></b>          |                                                                                       |            |
| S17-1                          | $\lambda$ pir                                                                         | (7)        |
| <b><i>B. bacteriovorus</i></b> |                                                                                       |            |
| 109J                           | carrying pMQ581                                                                       | This study |
| <b><i>V. cholerae</i></b>      |                                                                                       |            |
| CNV 116                        | N16961 <i>rbmA</i> -3xFLAG, <i>lacZ</i> :Ptac-mKate2                                  | (2)        |
| CNV 121                        | N16961 <i>rbmA</i> -3xFLAG, <i>lacZ</i> :Ptac-mKO- $\kappa$                           | (2)        |
| CNV 127                        | N16961, <i>lacZ</i> :Ptac-mKate2 $\Delta$ <i>rbmA</i>                                 | This study |
| CNV 64                         | <i>vpvC</i> W240R matrix hyper secretor, <i>lacZ</i> :Ptac-mKate2                     | This study |
| CNV 252                        | <i>vpvC</i> W240R matrix hyper secretor <i>rbmA</i> -3xFLAG, <i>lacZ</i> :Ptac-mKate2 | This study |

571

| Plasmid | Origin, marker | comments                                                                                         | source     |
|---------|----------------|--------------------------------------------------------------------------------------------------|------------|
| pCN769  | pR6K, Amp      | pBW <i>rbmA</i> -3xFLAG insertion                                                                | (2)        |
| pMQ581  | RFS1010, Gent  | Constructed by replacement of <i>tdTomato</i> with <i>gfpmut3</i> in pMQ414 parental plasmid (8) | This study |

572

573

574

575 **SI Materials and Methods References**

576

- 577 1. Duncan, M. C. *et al.* *Vibrio cholerae* motility exerts drag force to impede attack by the bacterial  
578 predator *Bdellovibrio bacteriovorus*. *Nat. Commun.* **9**, 4757 (2018).
- 579 2. Wucher, B. R. *et al.* *Vibrio cholerae* filamentation promotes chitin surface attachment at the expense  
580 of competition in biofilms. *Proc. Natl. Acad. Sci.* **116**, 14216–14221 (2019).
- 581 3. Sia, S. K. & Whitesides, G. M. Microfluidic devices fabricated in Poly(dimethylsiloxane) for  
582 biological studies. *ELECTROPHORESIS* **24**, 3563–3576 (2003).
- 583 4. Weibel, D. B., Diluzio, W. R. & Whitesides, G. M. Microfabrication meets microbiology. *Nat. Rev.*  
584 *Microbiol.* **5**, 209–218 (2007).
- 585 5. Díaz-Pascual, F. *et al.* Breakdown of *Vibrio cholerae* biofilm architecture induced by antibiotics  
586 disrupts community barrier function. *Nat. Microbiol.* **4**, 2136–2145 (2019).
- 587 6. Hartmann, R. *et al.* Emergence of three-dimensional order and structure in growing biofilms. *Nat.*  
588 *Phys.* **15**, 251–256 (2019).
- 589 7. de Lorenzo, V. & Timmis, K. N. Analysis and construction of stable phenotypes in gram-negative  
590 bacteria with Tn5- and Tn10-derived minitransposons. *Methods Enzymol.* **235**, 386–405 (1994).
- 591 8. Mukherjee, S. Brothers, K. M., Shanks, R. M. Q., Kadouri D. E. Visualizing *Bdellovibrio*  
592 *bacteriovorus* by using the tdTomato fluorescent protein. *Appl. Environ. Microbiol.* 82: 1653-16661

593 **Supplemental Figures**

594

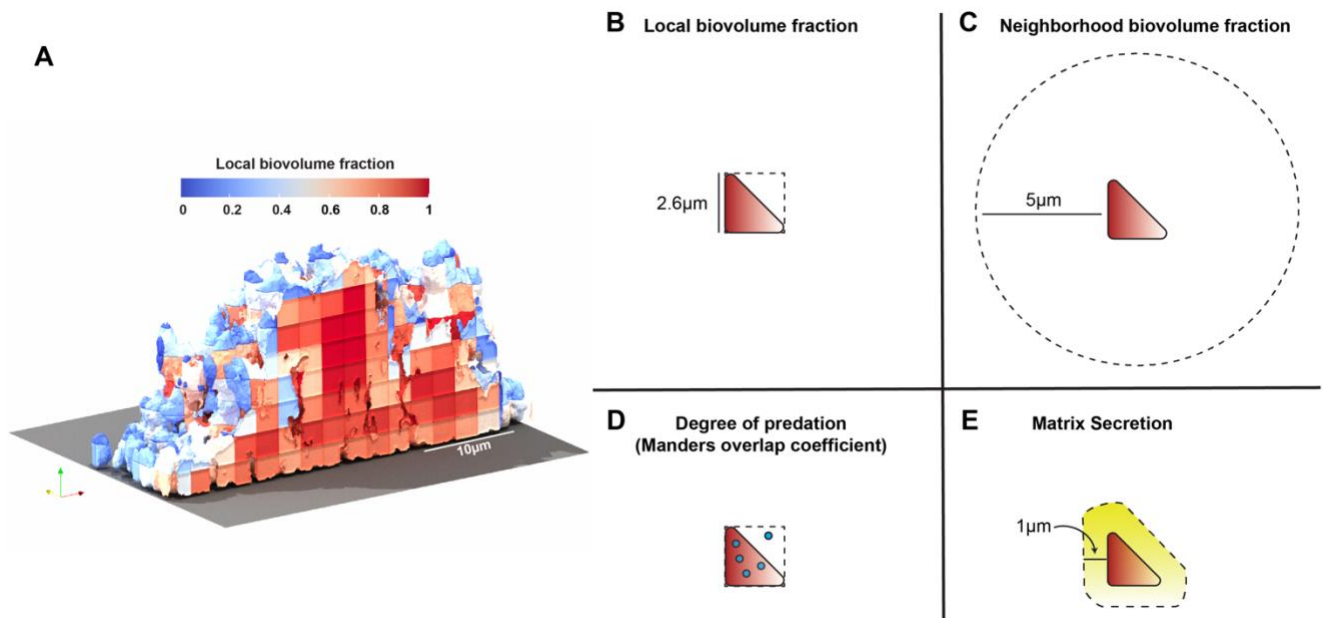

595

596 **Figure S1: 3D rendering of a segmented biovolume with cartoon representations of image analysis**

597 **parameters.** (A) 3D rendering how biofilms are segmented and dissected into a cubic grid for analysis.

598 Grid units here have been color-coded according to local biovolume fraction. (B) Local biovolume

599 fraction measures the proportion of each grid unit occupied by *V. cholerae*. (C) Neighborhood biovolume

600 fraction measures the proportion of the immediate neighborhood of each unit occupied by *V. cholerae*.

601 (D) The extent of overlap (Mander's overlap coefficient) describes the proportion of *B. bacteriovorus*

602 signal that overlaps with *V. cholerae* signal within any given cube. We refer to this metric in the main text

603 as 'degree of predation'. (E) Matrix secretion measures signal intensity of matrix fluorescence within a

604 1µm shell around each segmented element of *V. cholerae*.

605

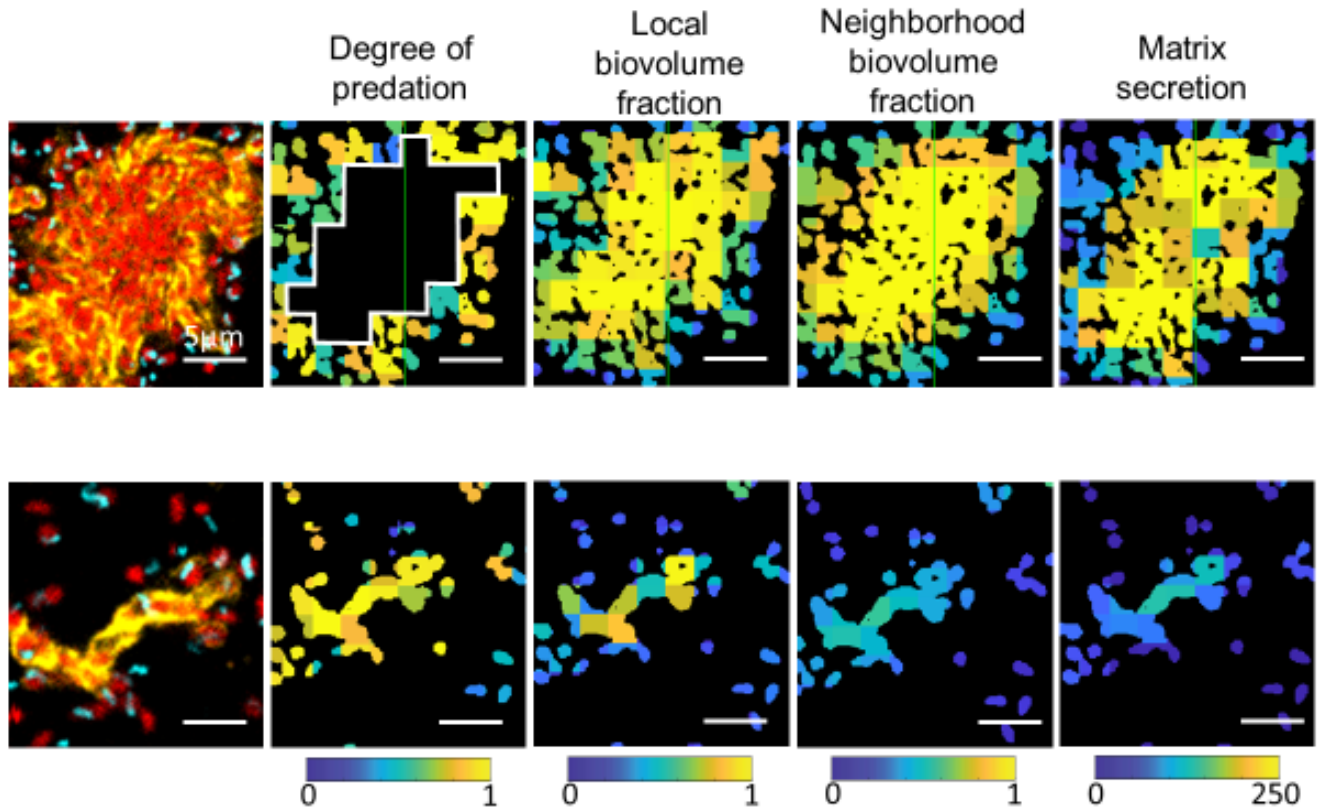

606

607

608 **Figure S2: Heatmaps for each parameter of image cytometry analysis showing key differences**  
609 **between small and large matrix-positive cell clusters.** Raw images are shown at left with degree of  
610 predation, local biovolume fraction, neighborhood volume fraction, and matrix secretion quantifications  
611 shown to the right.

612

613

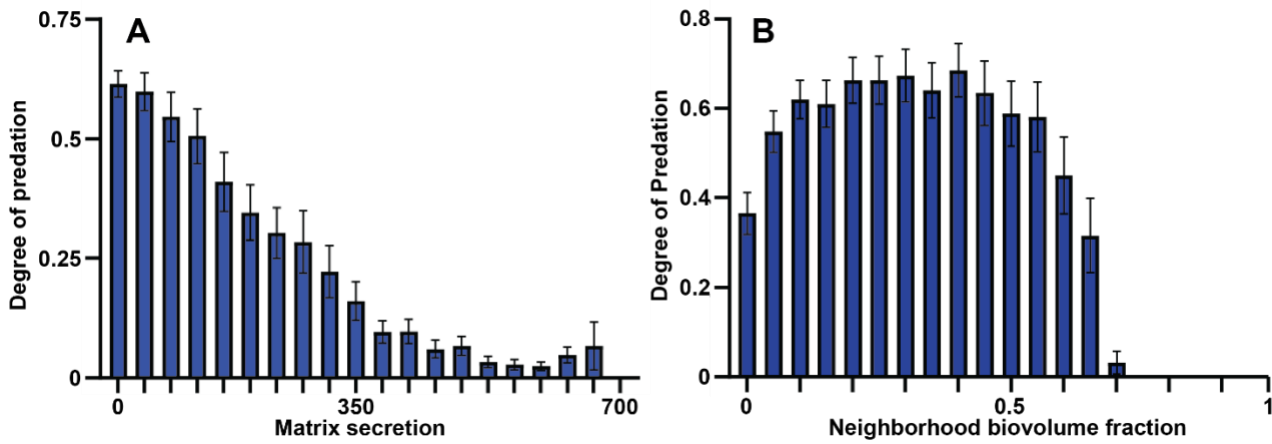

614

615

616 **Figure S3: Contribution of matrix secretion and neighborhood biovolume fraction to protection from**  
617 ***B. bacteriovorus* exposure.** (A) Distribution of the degree of predation as a function of local matrix  
618 accumulation. (B) Distribution of the degree of predation as a function of neighborhood biovolume  
619 fraction ( $n = 23$ ). The degree of predation decreases approximately linearly with local matrix  
620 accumulation, but decreases almost as a step-function as a function of neighborhood volume fraction.

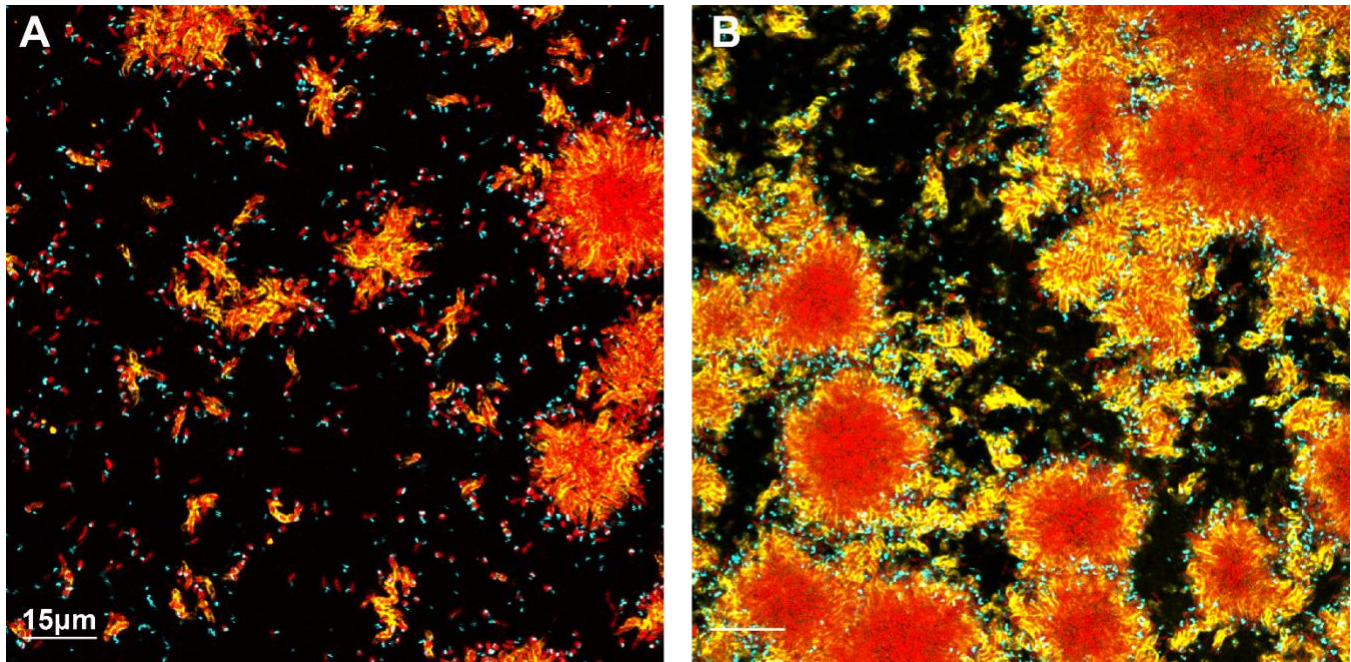

621

622

623 **Figure S4: Wide view images of *V. cholerae* (A) wild type and (B) matrix hyper-secreting biofilms 2**

624 **hours after exposure to *B. bacteriovorus* predation. Resident *V. cholerae* biofilms are shown in red,**

625 **biofilm matrix is shown in yellow, and *B. bacteriovorus* is shown in cyan.**



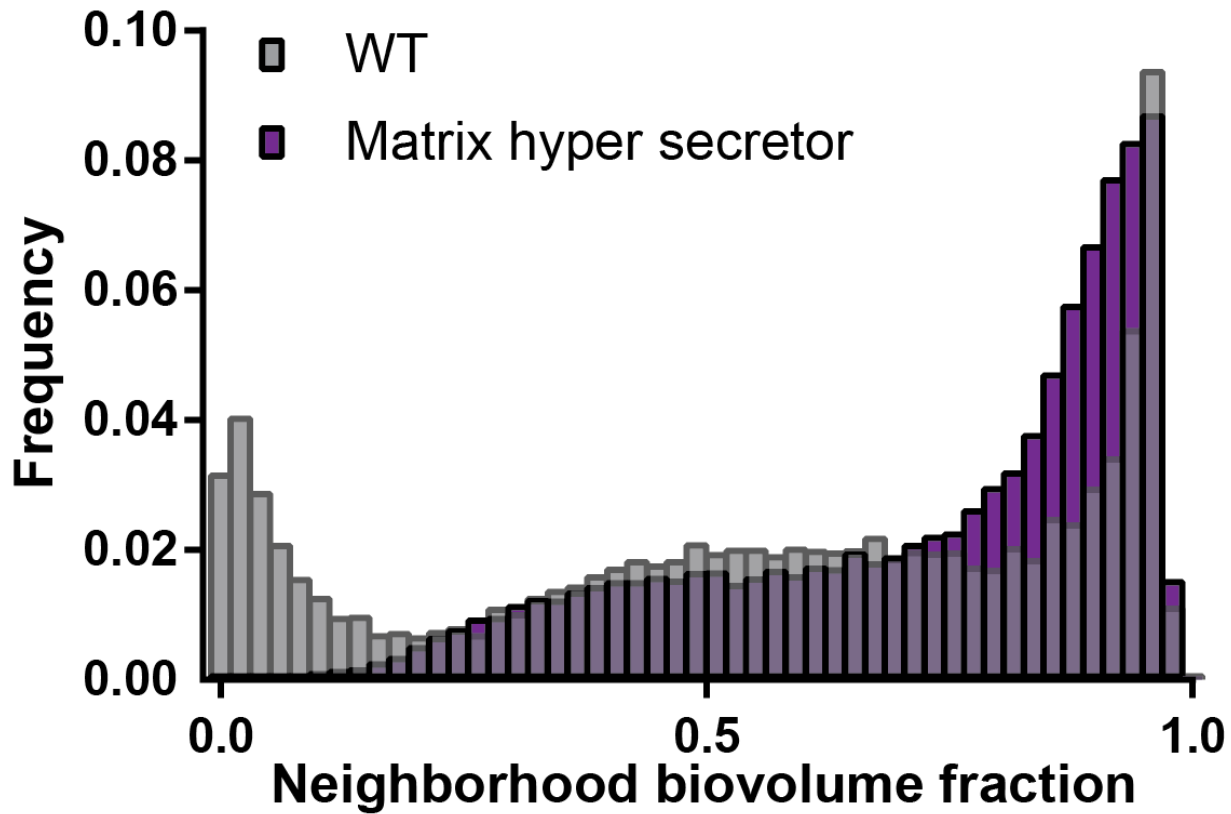

626

627

628 **Figure S5: Neighborhood biovolume frequency distributions for biofilms of *V. cholerae* wild type**  
629 **(grey bars) and a matrix hyper-secretor variant (purple bars).** Note that matrix hyper-secreting  
630 mutants have frequency distributions of cell-cell packing shifted toward higher values, allowing more  
631 biofilm clusters to survive. Both data sets were collected 2 hours post-exposure to predators ( $n = 9$ ).

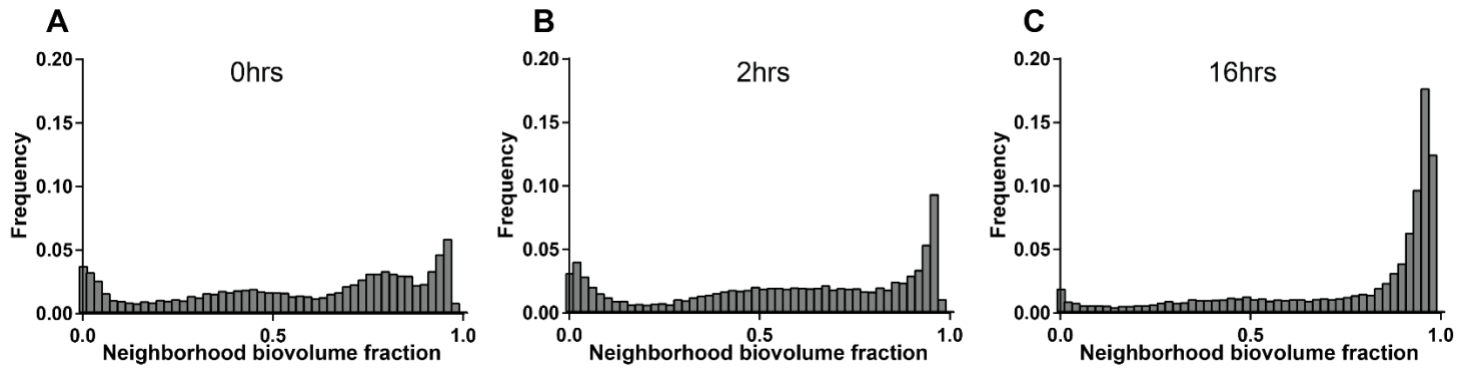

632

633

634

635

636

637

638

**Figure S6: Time course reveals rapid change in cell packing density of resident *V. cholerae* wild type under *B. bacteriovorus* predation.** Image stacks were taken at 3 time points following predator exposure ( $n = 15$  per time point). While modest changes can be seen after 2 h of predator exposure, a large change can be seen after 16 hours, similar to the frequency diagram outlined in Figure 4C of the main text corresponding to biofilms 48 h after predator exposure.

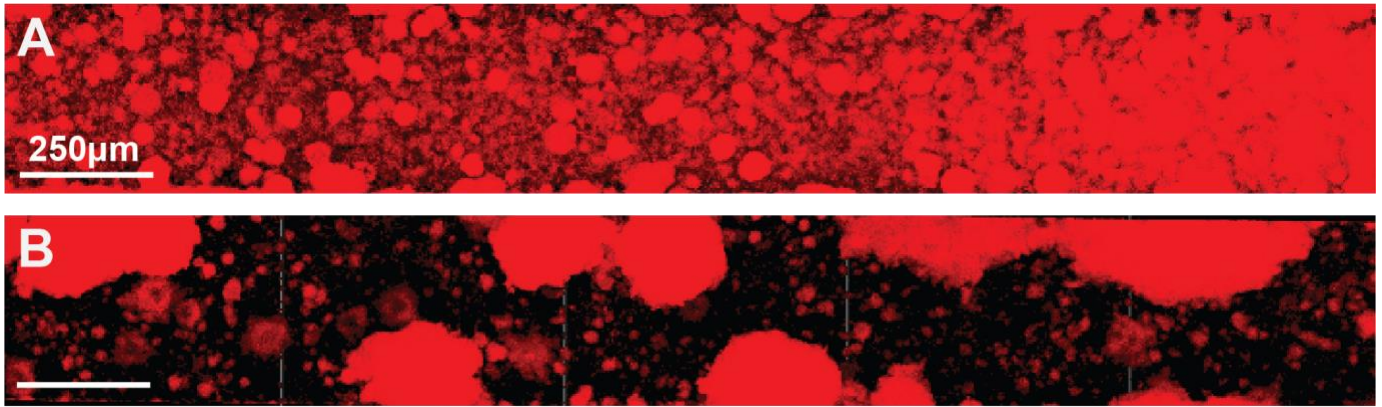

639

640

641

642

**Figure S7: Submillimeter-scale landscape changes occur in *V. cholerae* biofilms following *B. bacteriovorus* predation pressure.** View of an entire microfluidic device containing (A) *V. cholerae* un-  
exposed to predation or (B) *V. cholerae* biofilms 48 hours after predator exposure.
